# Supplementary material for: Facile synthesis and application of multi-shelled SnO2 hollow spheres in lithium ion battery
Source: Royal Society of Chemistry journal article supplement (doi:10.1039/c6ra11771f), 2016-01-01
Supplement: c6ra11771f1.pdf [file c6ra11771f1.pdf]

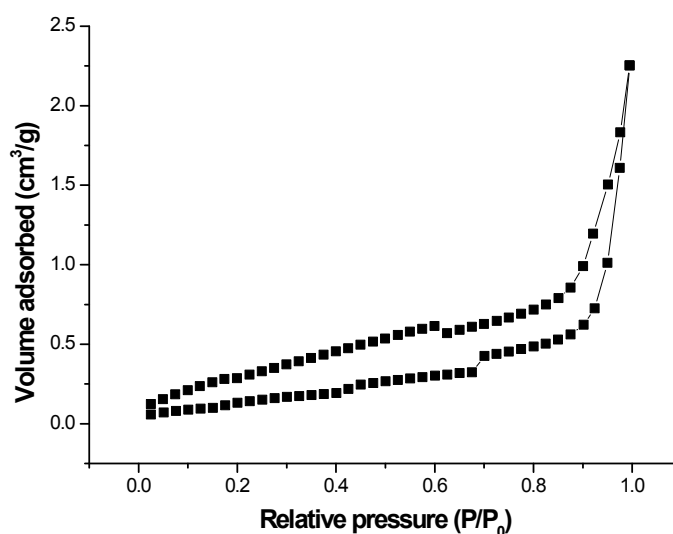

Fig. S1 N<sub>2</sub> adsorption-desorption isotherm for the double-shelled SnO<sub>2</sub> hollow sphere.

The synthesized SnO<sub>2</sub> sample exhibits type-IV isotherm plot with a sharp capillary condensation step, indicative of mesoporous structures. The BET surface area of double-shelled SnO<sub>2</sub> hollow sphere is 42.8 m<sup>2</sup> g<sup>-1</sup>.

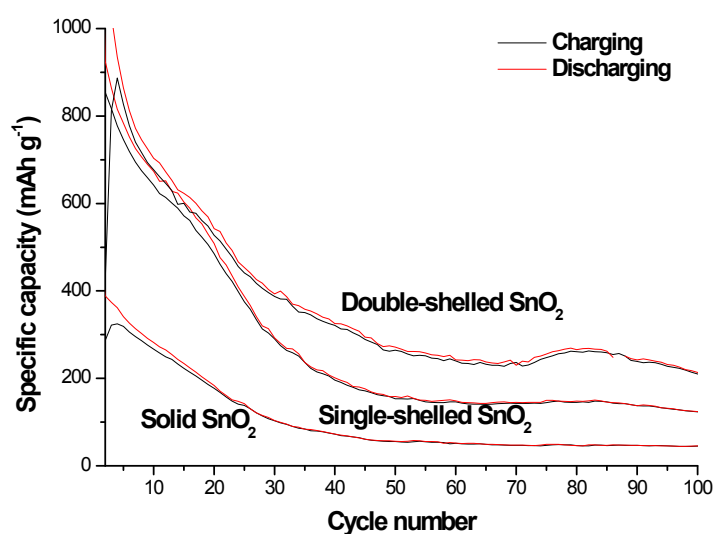

Fig. S2 The cycling performance of the various SnO<sub>2</sub> spheres.

When tested as the anode materials for LIBs, these complex double-shelled SnO<sub>2</sub> hollow spheres exhibit superior cyclic stability.

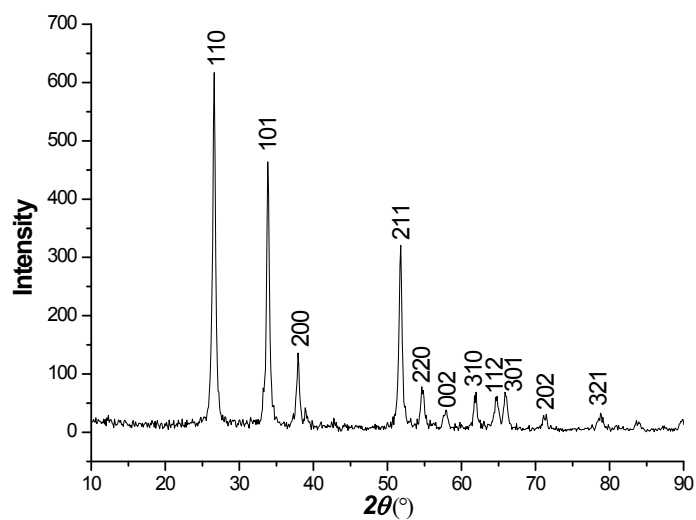

Fig. S3 XRD pattern of the double-shelled SnO<sub>2</sub> hollow sphere.

The crystallinity of the double-shelled SnO<sub>2</sub> hollow spheres is independently confirmed by XRD. All the peaks in the XRD pattern could be indexed to crystalline SnO<sub>2</sub> by comparison with JCPDS card No. 41-1445, indicating good phase purity.
